1 **Irreversible sterility of workers and high-volume egg production by queens in the**  
2 **stingless bee *Tetragonula carbonaria***

3

4 Francisco Garcia Bulle Bueno<sup>\*1</sup>, Rosalyn Gloag<sup>1</sup>, Tanya Latty<sup>2</sup> and Isobel Ronai<sup>1</sup>

<sup>1</sup> *Behaviour, Ecology and Evolution Laboratory, School of Life and Environmental Sciences A12, University of Sydney, Sydney NSW 2006, Australia.*

<sup>2</sup> *Insect Behaviour and Ecology Laboratory, School of Life and Environmental Sciences A12, University of Sydney, Sydney NSW 2006, Australia.*

\*fgar0019@uni.sydney.edu.au

5

6

## 7 **ABSTRACT**

8

9 Social insect reproduction is characterised by a division of labour. Typically, the queen is the  
 10 sole reproductive female in the colony and the female workers are non-reproductive.  
 11 However, in the majority of social insect species the workers are only facultatively sterile and  
 12 remain capable of laying eggs under some conditions, such as when the queen dies. The  
 13 Australian stingless bee *Tetragonula carbonaria* is noteworthy as workers never lay eggs,  
 14 even if a colony loses its queen. Here we describe the reproductive anatomy of *T. carbonaria*  
 15 workers (deactivated ovaries), virgin queens (semi-activated ovaries), and mated queens  
 16 (activated ovaries). *T. carbonaria* mated queens have high-volume egg production compared  
 17 to other female insects as each of their eight ovarioles (filaments of the ovary) produces  
 18 approximately 40 eggs per day. We then conduct the first experimental test of absolute  
 19 worker sterility in the social insects. Using a controlled microcolony environment, we  
 20 investigate whether the reproductive capacity of adult workers can be rescued by  
 21 manipulating the workers' social environment (separating them from a queen) and diet  
 22 (feeding them unrestricted highly nutritious honey bee royal jelly), both conditions which  
 23 cause ovary activation in bee species where workers are facultatively sterile. The ovaries of  
 24 *T. carbonaria* workers that are queenless and fed royal jelly remain non-functional,  
 25 indicating they are irreversibly sterile and that ovary degeneration is fixed prior to adulthood.  
 26 We suggest that *T. carbonaria* might have evolved absolute worker sterility because colonies  
 27 under natural conditions are unlikely to ever be queenless.

28

29 **KEYWORDS:** spermatheca; programmed cell death; reproductive system; monogamous;  
 30 eusociality; Old World clade.

31

32

## 33 INTRODUCTION

34

35 In social insects the reproductive labour is divided between queens and workers (Hammond  
36 and Keller, 2004; Naug and Wenzel, 2006). The queen is typically the sole reproductive  
37 female and her specialised function in the colony is to lay eggs. Whereas, the non-  
38 reproductive female workers forage for food, defend the colony against predators and care for  
39 the queen's brood (Michener, 1974).

40

41 In the majority of social insect species, workers are only facultatively sterile and have the  
42 ability to lay unfertilised haploid eggs that develop as males (Ebie et al., 2015; Khila and  
43 Abouheif, 2010; Wenseleers et al., 2004). The contribution of workers to the colony's male  
44 output is highly variable across social insect species, and is determined by kinship-mediated  
45 cooperation and within-colony conflict over male production (Alves et al., 2009; Herbers,  
46 1984; Mehdiabadi et al., 2003; Tóth et al., 2002; van Veen et al., 1990). Facultative worker  
47 sterility means that if the queen is lost and the colony cannot requeen, then workers can  
48 secure some reproductive success by producing males (Bourke, 1988).

49

50 The key determinants of the reproductive capacity of social insect workers is their nutritional  
51 status and social environment (Ronai et al., 2016). First, the presence of the queen, through  
52 aggressive interactions or pheromones, triggers programmed cell death in the ovaries of the  
53 workers (Luna-Lucena et al., 2018; Ronai et al., 2015); workers may therefore develop  
54 activated ovaries only in the queen's absence. Second, ovary development is trophogenic  
55 (Lisboa et al., 2005) as the quantity or quality of nutrients has a strong effect on ovary  
56 development (Boleli et al., 2000; Boleli et al., 1999; Corona et al., 2016; Cruz-Landim, 2000;  
57 Jarau et al., 2010; Luna-Lucena et al., 2018; Schwander et al., 2010; Tambasco, 1975). For  
58 example, in the honey bee *Apis mellifera*, females fed highly nutritious royal jelly as adults  
59 have activated ovaries even in the presence of queen pheromone (Kamakura, 2011;  
60 Kamakura, 2014; Lin and Winston, 1998; Pirk et al., 2010).

61

62 Stingless bees (Meliponini) are a species-diverse pantropical clade of social insect,  
63 comprising Old World and New World subclades that diverged 60-70 MYA (Michener,  
64 1974; Rasmussen and Cameron, 2009; Roubik, 1995). The reproductive habits of stingless  
65 bee workers have been best studied in the New World subclade, where workers produce  
66 males under queenright conditions (Beig et al., 1985; Boleli et al., 2000; Contel and Kerr,

1976), produce males only when queenless (Cruz-Landim, 2000; Tóth et al., 2004), lay trophic eggs which serve as nourishment for the queen (Wille, 1983), or never lay eggs (Boleli et al., 1999; Staurengo da Cunha, 1979). However, the reproductive habits of workers in the Old World subclade are relatively unknown.

In this study, we describe the reproductive anatomy of mated queens, virgin queens and female workers of the Australian stingless bee *Tetragonula carbonaria*. A colony of this Old World subclade species has one mated queen, thousands of non-reproductive female workers, some males and a few virgin queens (Gloag et al., 2007; Heard, 2016; Nunes et al., 2015). Notably, when the queen is removed from the colony, *T. carbonaria* female workers do not activate their ovaries (Nunes et al., 2015), suggesting they may be irreversibly sterile. To confirm this, we test whether manipulating the nutritional and social environment of age-matched adult female workers in a controlled microcolony environment can rescue their reproductive capacity (i.e. stimulate oogenesis). We hypothesised that if adult *T. carbonaria* workers are irreversibly sterile, then those fed an unrestricted highly nutritious diet in the absence of a queen would show no change in reproductive capacity.

## MATERIALS AND METHODS

### Biological material

Our study was carried out at the University of Sydney (Sydney, Australia) in December-January of 2017 and December-February of 2019. As the source colonies, we used seven *T. carbonaria* colonies (Colony 1–7) housed in wooden OATH hives (Heard, 2016). These colonies were queenright, weighed above average (8–9 kg, (Heard, 2016)) and had high forager activity at the entrance of the colony (~100 bees exiting per minute).

To obtain age-matched workers we extracted two discs of late stage worker brood comb (approximately 200 bees per disk) from a source colony and placed the discs in a container. The containers were then placed in an incubator (34.5 °C) for approximately 5 days. *T. carbonaria* worker brood comb contains both male and female brood in identical cells. Any males that emerged were removed from the container.

## **Worker and queen reproductive capacity**

To assess the differences in reproductive anatomy between castes under natural conditions, we collected newly emerged workers ( $n = 200$ , per colony), recognised by their pale colour, from four of the source colonies (Colony 1–4), colour-marked their thorax using POSCA Pens and returned them to their source colony. After 14 days, the majority of marked workers have lost their mark or died, but we collected 10 marked workers from each source colony.

We collected the mated queen (unknown age) and one virgin queen (unknown age) from each of these four source colonies (Colony 1–4). To extract the queens, we set up hives with a plastic lid so that we could observe the brood comb. Once the mated queen was collected, we waited 24 h for a virgin queen to emerge on the brood comb and then extracted a virgin queen. These virgin queens were walking on top of the brood comb flapping their wings and were being fed via trophallaxis by the workers. All collected workers and queens were immediately placed into a  $-80^{\circ}\text{C}$  freezer.

## **Manipulation of workers in microcolonies**

To manipulate the social environment and diet of adult workers we designed laboratory-based microcolonies (see Fig. S1) using small plastic containers. Each microcolony was provided with a pellet of propolis (a mix of wax and plant resins that stingless bees use as nest building material (Heard, 2016)) and a pellet of pot-pollen (pollen is stored in pots made of propolis (Heard, 2016) and is the main protein source for stingless bees), both obtained from *T. carbonaria* colonies. Into each microcolony we placed newly emerged workers ( $n = 50$  per microcolony, 8 microcolonies) from one of three source colonies (Colony 5–7). The eight microcolonies contained no queen and also no brood.

Four of the microcolonies were randomly assigned a control diet consisting of stingless bee honey and the other four paired (from the same source colony) microcolonies were assigned a royal jelly diet consisting of 50% stingless bee honey to 50% frozen royal jelly (Royal Jelly, Australia). Royal jelly is high in protein and contains important fatty acids (Altaye et al., 2010) and is fed to honey bee queens throughout their lifespan (Howe et al., 1985; Melampy and Jones, 1939; Viuda-Martos et al., 2008). Notably, feeding royal jelly to adult honey bee

workers causes them to activate their ovaries (Cardoso-Júnior et al., 2020; Lin and Winston, 1998; Wang et al., 2014; Yang et al., 2017) and feeding it to female fruit flies, crickets and silkworms increases their fecundity (Hodin, 2009; Hodin and Riddiford, 2000; Kamakura, 2014; Kayashima et al., 2012; Kunugi and Mohammed Ali, 2019; Miyashita et al., 2016; Xin et al., 2016).

The microcolonies were checked daily. Food and water were replenished when needed. Any dead workers were removed and recorded (see Table S1).

From each microcolony we collected workers ( $n = 2$ ) at 0 days of age. The remaining workers were collected at 14 days of age. Collected workers were immediately placed into a -80 °C freezer.

## Ovary dissections

We extracted the paired ovaries from each bee collected from both natural colonies and microcolonies. The tiny ovaries of the workers need to be carefully dissected as they are fragile and likely to break. We placed the ovaries in a drop of distilled water on a microscope slide and covered them with a cover slip. The ovaries were imaged under a dissecting microscope (Leica IC80 HD) at 0.67X (mated queens and virgin queens) and 4X (workers) magnification. We analysed the images with ImageJ (Rasband, 1997) while blind to treatment.

We evaluated the reproductive capacity and anatomy of *T. carbonaria* females following the protocols used in our previous studies of honey bee ovaries (Ronai et al., 2017; Ronai et al., 2015). For each bee, we assessed the ovary activation state (deactivated, semi-activated or activated) and counted the number of ovarioles (filaments) in an ovary. We then quantified the length of the ovary as a proxy for the amount of ovary development or degeneration. For workers, we measured the length of both ovaries (from the tip of the longest ovariole of each ovary to where the two oviducts join, Fig. S2A). For mated queens and virgin queens, it was impossible to measure the length of the ovarioles as they are tightly curled, so we measured the elliptical area of the ovary (area =  $a \times b \times \pi$ , where  $a$  is the major diameter divided by 2 and  $b$  is the minor diameter divided by 2, Fig. S2B). If still attached after dissection, we noted

the presence and status (semen present or absent) of the spherical spermatheca, the specialised organ used to store the sperm, and measured its diameter if present (Fig. S2).

For all workers, we investigated whether the length of the right and left ovary was correlated using a Pearson correlation so we could then compare the length of the longest ovary in our experimental treatments. To compare the length of the longest ovary of workers fed a Control diet and Royal jelly diet, we conducted a Student t-test (all assumptions were met) using R Studio (Version 1.3.959), <https://www.rstudio.com/>, with R packages the function “t.test” in the R package *stats v4.0.0* (Team, 2013).

## RESULTS

### Reproductive morphology of workers in queenright colonies

Queenright 14-day-old *T. carbonaria* workers had deactivated ovaries as no developing oocytes were present inside the ovarioles (Fig. 1). The number of ovarioles in the ovary of workers varied from four ovarioles to no ovarioles. The mean length of the longest ovary was  $0.65 \text{ mm} \pm 0.15 \text{ mm}$  ( $n = 40$ , Table S2). The length of the right and left ovary was asymmetric ( $P = 0.098$ , Table S3). Only 20% of workers ( $n = 8$ ) had an identifiable, but vestigial spermatheca with a mean diameter of  $0.05 \text{ mm} \pm 0.01 \text{ mm}$  (Fig. 2A, Table S2).

### Reproductive morphology of virgin queens and mated queens

*T. carbonaria* queens had four ovarioles per ovary (Fig. 2). We observed that the ovaries of *T. carbonaria* are meroistic polytrophic (Büning, 1994; Martins and Serrão, 2004) as a single germ cell produces both an oocyte and connected nurse cells, which move with the developing oocyte through the ovariole. As an oocyte moves from the tip of the ovariole to the base it progresses through stages of development (stem cell, germarium and vitellarium) (Ronai et al., 2015).

Virgin queens had semi-activated ovaries with oogenesis underway (Fig. 1) and the mean area of the largest ovary was  $1.02 \text{ mm}^2 \pm 0.12 \text{ mm}^2$  ( $n = 4$ , Table S4). The spermatheca had a mean diameter of  $0.55 \text{ mm} \pm 0.03 \text{ mm}$  ( $n = 3$ , Table S4). For two of the virgin queens the

spermatheca reservoir was transparent indicating it was empty (Fig. 2C), however the third virgin queen had a filled spermatheca reservoir indicating that she mated within the 24 hours that there was no mated queen in the colony (Fig. 2D).

Mated queens had activated ovaries full of mature oocytes (Fig. 1). Some of the activated ovaries had yellow bodies present, a consequence of previous oviposition (Feneron and Billen, 1996; Gobin et al., 1998). The mean area of the largest ovary was  $13.41 \text{ mm}^2 \pm 2.99 \text{ mm}^2$  ( $n = 4$ , Table S4), approximately thirteen times larger than the virgin queens. In order to fit inside the abdomen (approximately 6.5 mm in length) of the queen the ovaries are curled tightly in a spiral and occupy the majority of the abdominal cavity. The spermatheca had a mean diameter of  $1.05 \text{ mm} \pm 0.81 \text{ mm}$  ( $n = 2$ , Table S4) and for both the reservoir was filled with a milky white substance indicating the presence of semen (Fig. 2B).

#### **Reproductive morphology of queenless workers fed royal jelly diet and control diet**

Both royal jelly diet and control diet queenless workers had degenerated and deactivated ovaries. The mean length of the longest ovary of 0-day old workers was  $0.56 \text{ mm} \pm 0.1 \text{ mm}$  ( $n = 16$ , Table S2). The mean length of the longest ovary of 14-day-old workers fed a control diet was  $0.57 \text{ mm} \pm 0.14 \text{ mm}$  ( $n = 40$ , Table S2) and a royal diet was  $0.59 \text{ mm} \pm 0.11 \text{ mm}$  ( $n = 40$ , Table S2). The mean length of the right and left ovary was significantly correlated for both control diet and royal diet workers ( $P = 0.001$  and  $0.007$  respectively, Table S3). There was no significant difference in the mean length of the longest ovary between the control diet and royal diet treatments after 14 days ( $t = -0.68194$ ,  $df = 75.203$ ,  $p = 0.4974$ , Fig. 3).

## **DISCUSSION**

An unrestricted high quality diet and the absence of the queen failed to rescue the reproductive capacity of *T. carbonaria* adult workers, indicating that they are irreversibly sterile. This absolute sterility is consistent with observations from natural nests in which workers never lay eggs, even if queenless (Gloag et al., 2007; Nunes et al., 2014). Absolute sterility of workers is relatively rare among social insect species. Only 13 genera have so far been classified as having truly sterile workers based on observations under natural conditions



(Ronai et al., 2016); whether sterility is irreversible in these species has not yet been tested experimentally.

Why have a few genera of social insect evolved absolute worker sterility and forgone the obvious benefits of facultative sterility? It is likely that the life history of some species predisposes them to the evolution of absolute worker sterility. *T. carbonaria* have a high and constant rate of queen production (Heard, 2016) when compared to other stingless bee species with facultative worker sterility (Grosso et al., 2000; Ribeiro et al., 2003; Van Veen and Sommeijer, 2000). A colony is unlikely to ever have no queen present and there would never be a need for workers to lay eggs (Engels and Imperatriz-Fonseca, 1990; Michener, 1974).

Species that have a constant supply of virgin queens from which they can select the most fecund one or rear new queens very quickly may be more likely to evolve absolute worker sterility (Sommeijer et al., 1994). Another possible explanation for the evolution of absolute worker sterility is the high rate of colony-takeovers in *T. carbonaria* (Cunningham et al., 2014; Gloag et al., 2008). This behaviour reduces the chance that a colony would ever have a prolonged period where it was queenless and that the workers would need to lay eggs.

Alternatively, absolute worker sterility may resolve reproductive conflict within colonies. *Tetragonula carbonaria* is a monogamous species (Green and Oldroyd, 2002). Under monogamous queens, workers in a colony are all full sisters and workers would be more related to their own sons ( $r = 0.5$ ) than the sons of the queen ( $r = 0.25$ ). If workers have the ability to lay eggs, there would be worker-queen conflict for male production in the colony (Trivers and Hare, 1976). The evolution of absolute worker sterility in monogamous species eliminates the worker-queen conflict to the benefit of the queen. However, many social insects, including most New World subclade stingless bees, have both monogamous queens and workers that lay eggs (Vollet-Neto et al., 2018).

We find that *T. carbonaria* workers emerge from pupation with non-functional ovaries that contain no germ cells. The degeneration of the ovary in *T. carbonaria* workers must therefore occur prior to adulthood. To date, only one other genera of stingless bee in the New World subclade has been proposed to have absolute worker sterility, *Frieseomelitta* spp. (Boleli et al., 2000; Boleli et al., 1999; Luna-Lucena et al., 2018; Ronai et al., 2016) and their ovaries

degenerate during the last pupal stage via apoptosis (Boleli et al., 1999). Further work is needed to establish whether the degeneration of the ovaries in *T. carbonaria* workers is initiated during the embryonic, larval or pupal stage. In *T. carbonaria* the ovary degeneration in workers is likely determined by their nutritional environment pre-emergence as worker-destined larvae provisioned with a smaller quantity of food than queen-destined larvae (Nunes et al., 2015).

Even when the workers of social insects have activated ovaries, they may not have a storage organ for semen. The spermatheca is thus normally absent from workers (Gobin et al., 2008; Hölldobler and Wilson, 1990; Khila and Abouheif, 2010; Van Eeckhoven and Duncan, 2020). However, *T. carbonaria* workers sometimes have a vestigial spermatheca, the first reported case in the Old World subclade of stingless bees. Vestigial spermatheca are present in workers of the one other stingless bee genera with absolute worker sterility (Boleli et al., 2000) and also in honey bee species with facultative worker sterility (Gobin et al., 2006; Gotoh et al., 2013). The presence of a vestigial spermatheca in species where the workers have degenerated ovaries provides evidence that spermatheca degeneration is a separate process to the degeneration of the ovaries.

Our analyses of ovary anatomy in *T. carbonaria* highlights that the exceptionally high reproductive capacity of queens is achieved in different ways in the different clades of eusocial bees. Stingless bees and honey bees (*Apis* spp.) each evolved highly eusocial life histories independently, from an ancestral corbiculae apid with more simple sociality (Cardinal and Danforth, 2011). *Tetragonula carbonaria* queens lay approximately 300 eggs per day (Heard, 2016) but have only 8 ovarioles in total; therefore each ovariole is elongated and produces around 37 eggs per day. In contrast, *A. mellifera* queens lay approximately 2000 eggs per day (Page and Erickson, 1988) but have on average 320 ovarioles in total (Jackson et al., 2011); therefore each ovariole is relatively short and produces only around 6 eggs per day. That is, the lower number of ovarioles in stingless bee queens when compared to honey bee queens is compensated by high volume egg production in each ovariole of the ovary.

In conclusion, *T. carbonaria* workers are irreversibly sterile as adults. Conducting similar studies of workers in the other *Tetragonula* spp. would establish whether absolute sterility is

a characteristic of this genus. Studies of absolute worker sterility, and the factors that favour its evolution, are likely to provide a deeper understanding of the evolution of eusociality.

## ACKNOWLEDGEMENTS

We thank Liz Gibson and Peter Clarke for their support in lending colonies of *T. carbonaria*.

## COMPETING INTERESTS

No competing interests declared.

## AUTHOR CONTRIBUTIONS

Conceptualisation: F.G.B.B, I.R.; Methodology: F.G.B.B, I.R.; Validation: F.G.B.B, I.R.; Formal analysis: F.G.B.B, I.R.; Investigation: F.G.B.B; Writing - original draft: F.G.B.B, I.R.; Writing - review & editing: F.G.B.B, R.G., T. L., I.R.; Visualisation: F.G.B.B, I.R.; Funding acquisition: R.G., T.L..

## FUNDING

This research was supported by AgriFutures Australia, though funding from the Australian Government Department of Agriculture.

## REFERENCES

Altaye, S. Z., Pirk, C. W., Crewe, R. M. and Nicolson, S. W. (2010). Convergence of carbohydrate-biased intake targets in caged worker honeybees fed different protein sources. *Journal of Experimental Biology* **213**, 3311-3318.

Alves, D. d. A., Imperatriz-Fonseca, V. L., Franco, T. M., Santos-Filho, P. d. S., Nogueira-Neto, P., Billen, J. and Wenseleers, T. (2009). The queen is dead—long live the workers: intraspecific parasitism by workers in the stingless bee *Melipona scutellaris*. *Molecular ecology* **18**, 4102-4111.

Beig, D., Bueno, O. C. and Muller, T. (1985). Características dos alveolos de cria e postura de operárias em *Melipona quadrifasciata anthidioides* Lep.(Hym., Apidae, Meliponinae). *Naturalia (São José do Rio Preto)* **10**, 75-81.

333           **Boleli, I. C., Paulino-Simões, Z. L. and Bitondi, M. M. G.** (2000). Regression of  
334 the lateral oviducts during the larval-adult transformation of the reproductive system of  
335 *Melipona quadrifasciata* and *Frieseomelitta varia*. *Journal of morphology* **243**, 141-151.

336           **Boleli, I. C., Paulino-Simões, Z. L. and Gentile Bitondi, M. M.** (1999). Cell death  
337 in ovarioles causes permanent sterility in *Frieseomelitta varia* worker bees. *Journal of*  
338 *morphology* **242**, 271-282.

339           **Bourke, A. F.** (1988). Worker reproduction in the higher eusocial Hymenoptera. *The*  
340 *quarterly review of biology* **63**, 291-311.

341           **Büning, J.** (1994). The insect ovary: ultrastructure, previtellogenic growth and  
342 evolution: Springer Science & Business Media.

343           **Cardinal, S. and Danforth, B. N.** (2011). The antiquity and evolutionary history of  
344 social behavior in bees. *PloS one* **6**.

345           **Cardoso-Júnior, C. A. M., Oldroyd, B. P. and Ronai, I.** (2020). Vitellogenin  
346 expression in the ovaries of adult honeybee workers provides insights into the evolution of  
347 reproductive and social traits. *bioRxiv*, 547760.

348           **Contel, E. and Kerr, W.** (1976). Origin of males in *Melipona subnitida* estimated  
349 from data of an isozymic polymorphic system. *Genetica* **46**, 271-277.

350           **Corona, M., Libbrecht, R. and Wheeler, D. E.** (2016). Molecular mechanisms of  
351 phenotypic plasticity in social insects. *Current opinion in insect science* **13**, 55-60.

352           **Cruz-Landim, C. d.** (2000). Ovarian development in *Meliponine bees*  
353 (Hymenoptera: Apidae): the effect of queen presence and food on worker ovary development  
354 and egg production. *Genetics and molecular biology* **23**, 83-88.

355           **Cunningham, J. P., Hereward, J. P., Heard, T. A., De Barro, P. J. and West, S.**  
356 **A.** (2014). Bees at war: interspecific battles and nest usurpation in stingless bees. *The*  
357 *American Naturalist* **184**, 777-786.

358           **Ebie, J. D., Hölldobler, B. and Liebig, J.** (2015). Larval regulation of worker  
359 reproduction in the polydomous ant *Novomessor cockerelli*. *The Science of Nature* **102**, 72.

360           **Engels, W. and Imperatriz-Fonseca, V. L.** (1990). Caste development, reproductive  
361 strategies, and control of fertility in honey bees and stingless bees. In *Social Insects*, pp. 167-  
362 230: Springer.

363           **Feneron, R. and Billen, J.** (1996). Ovarian cycle in *Ectatomma tuberculatum*  
364 workers (Formicidae, Ponerinae). *Invertebrate reproduction & development* **29**, 79-85.

- 365 **Gloag, R., Beekman, M., Heard, T. and Oldroyd, B.** (2007). No worker  
366 reproduction in the Australian stingless bee *Trigona carbonaria* Smith (Hymenoptera,  
367 Apidae). *Insectes Sociaux* **54**, 412-417.
- 368 **Gloag, R., Heard, T., Beekman, M. and Oldroyd, B.** (2008). Nest defence in a  
369 stingless bee: What causes fighting swarms in *Trigona carbonaria* (Hymenoptera,  
370 Meliponini)? *Insectes Sociaux* **55**, 387-391.
- 371 **Gobin, B., Ito, F., Billen, J. and Peeters, C.** (2008). Degeneration of sperm reservoir  
372 and the loss of mating ability in worker ants. *Naturwissenschaften* **95**, 1041-1048.
- 373 **Gobin, B., Ito, F., Peeters, C. and Billen, J.** (2006). Queen-worker differences in  
374 spermatheca reservoir of phylogenetically basal ants. *Cell and tissue research* **326**, 169-178.
- 375 **Gobin, B., Peeters, C. and Billen, J.** (1998). Production of trophic eggs by virgin  
376 workers in the ponerine ant *Gnamptogenys menadensis*. *Physiological entomology* **23**, 329-  
377 336.
- 378 **Gotoh, A., Ito, F. and Billen, J.** (2013). Vestigial spermatheca morphology in  
379 honeybee workers, *Apis cerana* and *Apis mellifera*, from Japan. *Apidologie* **44**, 133-143.
- 380 **Green, C. and Oldroyd, B.** (2002). Queen mating frequency and maternity of males  
381 in the stingless bee *Trigona carbonaria* Smith. *Insectes Sociaux* **49**, 196-202.
- 382 **Grosso, A. F., Bego, L. R. and Martinez, A. S.** (2000). The production of males in  
383 queenright colonies of *Tetragonisca angustula angustula* (Hymenoptera, Meliponinae).  
384 *Sociobiology* **35**, 475-485.
- 385 **Hammond, R. L. and Keller, L.** (2004). Conflict over male parentage in social  
386 insects. *PLoS biology* **2**.
- 387 **Heard, T.** (2016). The Australian Native Bee Book: keeping stingless bee hives for  
388 pets, pollination and sugarbag honey: Sugarbag Bees.
- 389 **Herbers, J. M.** (1984). Queen-worker conflict and eusocial evolution in a polygynous  
390 ant species. *Evolution*, 631-643.
- 391 **Hodin, J.** (2009). She shapes events as they come: plasticity in female insect  
392 reproduction. In *Phenotypic plasticity of insects: mechanisms and consequences*, eds. D. W.  
393 Whitman and T. N. Ananthakrishnan), pp. 423-521. U.S.A.: Science publishers.
- 394 **Hodin, J. and Riddiford, L. M.** (2000). Different mechanisms underlie phenotypic  
395 plasticity and interspecific variation for a reproductive character in drosophilids (Insecta:  
396 Diptera). *Evolution* **54**, 1638-1653.
- 397 **Hölldobler, B. and Wilson, E. O.** (1990). The ants: Harvard University Press.

- 398           **Howe, S., Dimick, P. and Benton, A.** (1985). Composition of freshly harvested and  
399 commercial royal jelly. *Journal of Apicultural Research* **24**, 52-61.
- 400           **Jackson, J. T., Tarpy, D. R. and Fahrbach, S. E.** (2011). Histological estimates of  
401 ovariole number in honey bee queens, *Apis mellifera*, reveal lack of correlation with other  
402 queen quality measures. *Journal of Insect Science* **11**, 82.
- 403           **Jarau, S., Van Veen, J. W., Twele, R., Reichle, C., Gonzales, E. H., Aguilar, I.,**  
404 **Francke, W. and Ayasse, M.** (2010). Workers make the queens in *Melipona* bees:  
405 identification of geraniol as a caste determining compound from labial glands of nurse bees.  
406 *Journal of chemical ecology* **36**, 565-569.
- 407           **Kamakura, M.** (2011). Royalactin induces queen differentiation in honeybees.  
408 *Nature* **473**, 478-483.
- 409           **Kamakura, M.** (2014). Royalactin induces queen differentiation in honeybees.
- 410           **Kayashima, Y., Yamanashi, K., Sato, A., Kumazawa, S. and Yamakawa-**  
411 **Kobayashi, K.** (2012). Freeze-dried royal jelly maintains its developmental and  
412 physiological bioactivity in *Drosophila melanogaster*. *Bioscience, biotechnology, and*  
413 *biochemistry*, 120496.
- 414           **Khila, A. and Abouheif, E.** (2010). Evaluating the role of reproductive constraints in  
415 ant social evolution. *Philosophical Transactions of the Royal Society B: Biological Sciences*  
416 **365**, 617-630.
- 417           **Kunugi, H. and Mohammed Ali, A.** (2019). Royal Jelly and Its Components  
418 Promote Healthy Aging and Longevity: From Animal Models to Humans. *International*  
419 *journal of molecular sciences* **20**, 4662.
- 420           **Lin, H. and Winston, M. L.** (1998). The role of nutrition and temperature in the  
421 ovarian development of the worker honey bee (*Apis mellifera*). *The Canadian Entomologist*  
422 **130**, 883-891.
- 423           **Lisboa, L. C. O., Serrão, J. E., Cruz-Landim, C. and Campos, L. A. O.** (2005).  
424 Effect of Larval Food Amount on Ovariole Development in Queens of *Trigona spinipes*  
425 (Hymenoptera, Apinae). *Anatomia, histologia, embryologia* **34**, 179-184.
- 426           **Luna-Lucena, D., Rabico, F. and Simoes, Z. L.** (2018). Reproductive capacity and  
427 castes in eusocial stingless bees (Hymenoptera: Apidae). *Current opinion in insect science*.
- 428           **Martins, G. F. and Serrão, J. E.** (2004). A comparative study of the ovaries in some  
429 Brazilian bees (Hymenoptera; Apoidea). *Papéis Avulsos de Zoologia (São Paulo)* **44**, 45-53.



430           **Mehdiabadi, N. J., Reeve, H. K. and Mueller, U. G.** (2003). Queens versus  
431 workers: sex-ratio conflict in eusocial Hymenoptera. *Trends in ecology & evolution* **18**, 88-  
432 93.

433           **Melampy, R. and Jones, D. B.** (1939). Chemical Composition and Vitamin Content  
434 of Royal Jelly. *Proceedings of the Society for Experimental Biology and Medicine* **41**, 382-  
435 388.

436           **Michener, C. D.** (1974). The social behavior of the bees: a comparative study:  
437 Harvard University Press.

438           **Miyashita, A., Kizaki, H., Sekimizu, K. and Kaito, C.** (2016). Body-enlarging  
439 effect of royal jelly in a non-holometabolous insect species, *Gryllus bimaculatus*. *Biology*  
440 *open* **5**, 770-776.

441           **Naug, D. and Wenzel, J.** (2006). Constraints on foraging success due to resource  
442 ecology limit colony productivity in social insects. *Behavioral ecology and sociobiology* **60**,  
443 62-68.

444           **Nunes, T. M., Heard, T. A., Venturieri, G. C. and Oldroyd, B. P.** (2015).  
445 Emergency queens in *Tetragonula carbonaria* (Smith, 1854)(Hymenoptera: Apidae:  
446 Meliponini). *Austral Entomology* **54**, 154-158.

447           **Nunes, T. M., Mateus, S., Favaris, A. P., Amaral, M. F., Von Zuben, L. G.,**  
448 **Clososki, G. C., Bento, J. M., Oldroyd, B. P., Silva, R. and Zucchi, R.** (2014). Queen  
449 signals in a stingless bee: suppression of worker ovary activation and spatial distribution of  
450 active compounds. *Scientific reports* **4**, 7449.

451           **Page, R. and Erickson, E.** (1988). Reproduction by worker honey bees (*Apis*  
452 *mellifera* L.). *Behavioral ecology and sociobiology* **23**, 117-126.

453           **Pirk, C. W., Boodhoo, C., Human, H. and Nicolson, S. W.** (2010). The importance  
454 of protein type and protein to carbohydrate ratio for survival and ovarian activation of caged  
455 honeybees (*Apis mellifera scutellata*). *Apidologie* **41**, 62-72.

456           **Rasband, W. S.** (1997). ImageJ: Bethesda, MD.

457           **Rasmussen, C. and Cameron, S. A.** (2009). Global stingless bee phylogeny supports  
458 ancient divergence, vicariance, and long distance dispersal. *Biological Journal of the Linnean*  
459 *Society* **99**, 206-232.

460           **Ribeiro, M. F., Imperatriz-Fonseca, V. L. and Santos Filho, P. S.** (2003).  
461 Exceptional high queen production in the Brazilian stingless bee *Plebeia remota*. *Studies on*  
462 *Neotropical Fauna and Environment* **38**, 111-114.

463           **Ronai, I., Allsopp, M. H., Tan, K., Dong, S., Liu, X., Vergoz, V. and Oldroyd, B.**  
464           **P.** (2017). The dynamic association between ovariole loss and sterility in adult honeybee  
465           workers. *Proc. R. Soc. B* **284**, 20162693.

466           **Ronai, I., Barton, D. A., Oldroyd, B. P. and Vergoz, V.** (2015). Regulation of  
467           oogenesis in honey bee workers via programmed cell death. *Journal of insect Physiology* **81**,  
468           36-41.

469           **Ronai, I., Vergoz, V. and Oldroyd, B.** (2016). The mechanistic, genetic, and  
470           evolutionary basis of worker sterility in the social Hymenoptera. In *Advances in the Study of*  
471           *Behavior*, vol. 48 (ed. J. C. M. Marc Naguib, Leigh W. Simmons, Louise Barrett, Sue Healy,  
472           Marlene Zuk), pp. 251-317. Cambridge, US: Academic Press.

473           **Roubik, D. W.** (1995). Pollination of cultivated plants in the tropics: Food &  
474           Agriculture Org.

475           **Schwander, T., Lo, N., Beekman, M., Oldroyd, B. P. and Keller, L.** (2010). Nature  
476           versus nurture in social insect caste differentiation. *Trends in ecology & evolution* **25**, 275-  
477           282.

478           **Sommeijer, M., Koedam, D. and Monge, I. A.** (1994). Social Interactions of Gynes  
479           and Their Longevity in Queenright Colonies of *Melipona Favosa* (Apidae: Meliponinae).  
480           *Netherlands Journal of Zoology* **45**, 480-494.

481           **Staurengo da Cunha, M. A.** (1979). Ovarian development in *Scaptotrigona postica*  
482           Latr. 1807 (Hym.: Apidae) II. A quantitative study. *Insectes Sociaux* **26**, 196-203.

483           **Tambasco, A.** (1975). Aspectos do processo reprodutivo e da citologia de femeas de  
484           meliponideos. *Embrapa Pecúária Sudeste-Tese/dissertação (ALICE)*.

485           **Team, R. C.** (2013). R: A language and environment for statistical computing.

486           **Tóth, E., Queller, D. C., Dollin, A. and Strassmann, J. E.** (2004). Conflict over  
487           male parentage in stingless bees. *Insectes Sociaux* **51**, 1-11.

488           **Tóth, E., Strassmann, J. E., Nogueira-Neto, P., Imperatriz-Fonseca, V. L. and**  
489           **Queller, D. C.** (2002). Male production in stingless bees: variable outcomes of queen–  
490           worker conflict. *Molecular ecology* **11**, 2661-2667.

491           **Trivers, R. L. and Hare, H.** (1976). Haplodiploidy and the evolution of the social  
492           insect. *Science* **191**, 249-263.

493           **Van Eeckhoven, J. and Duncan, E. J.** (2020). Mating status and the evolution of  
494           eusociality: Oogenesis is independent of mating status in the solitary bee *Osmia bicornis*.  
495           *Journal of insect Physiology* **121**, 104003.



- 496 **van Veen, J., Arce, H. and Sommeijer, M. J.** (1990). Production of males in  
497 colonies of *Melipona beecheii*, Costa Rica. In *Actes des Colloques Insectes Sociaux, Vol. 6.*  
498 *Compte rendu Colloque annuel, Le Brassus, 19-23 Sept. 1989.*, pp. 57-62: Université Paul-  
499 Sabatier.
- 500 **Van Veen, J. and Sommeijer, M. J.** (2000). Colony reproduction in *Tetragonisca*  
501 *angustula* (Apidae, Meliponini). *Insectes Sociaux* **47**, 70-75.
- 502 **Viuda-Martos, M., Ruiz-Navajas, Y., Fernández-López, J. and Pérez-Álvarez, J.**  
503 (2008). Functional properties of honey, propolis, and royal jelly. *Journal of food science* **73**,  
504 R117-R124.
- 505 **Vollet-Neto, A., Koffler, S., dos Santos, C., Menezes, C., Nunes, F., Hartfelder,**  
506 **K., Imperatriz-Fonseca, V. and Alves, D.** (2018). Recent advances in reproductive biology  
507 of stingless bees. *Insectes Sociaux*, 1-12.
- 508 **Wang, H., Zhang, S.-W., Zeng, Z.-J. and Yan, W.-Y.** (2014). Nutrition affects  
509 longevity and gene expression in honey bee (*Apis mellifera*) workers. *Apidologie* **45**, 618-  
510 625.
- 511 **Wenseleers, T., Helanterä, H., Hart, A. and Ratnieks, F. L.** (2004). Worker  
512 reproduction and policing in insect societies: an ESS analysis. *Journal of evolutionary*  
513 *biology* **17**, 1035-1047.
- 514 **Wille, A.** (1983). Biology of the stingless bees. *Annual review of entomology* **28**, 41-  
515 64.
- 516 **Xin, X.-x., Chen, Y., Chen, D., Xiao, F., Parnell, L. D., Zhao, J., Liu, L., Ordovas,**  
517 **J. M., Lai, C.-Q. and Shen, L.-r.** (2016). Supplementation with major royal-jelly proteins  
518 increases lifespan, feeding, and fecundity in *Drosophila*. *Journal of agricultural and food*  
519 *chemistry* **64**, 5803-5812.
- 520 **Yang, W., Tian, Y., Han, M. and Miao, X.** (2017). Longevity extension of worker  
521 honey bees (*Apis mellifera*) by royal jelly: optimal dose and active ingredient. *PeerJ* **5**,  
522 e3118.

## FIGURE LEGENDS

**Figure 1. The ovaries of *T. carbonaria* females.** Queenright 14-day old workers have deactivated ovaries (no developing oocytes present) with zero to four ovarioles. Virgin queens have semi-activated ovaries (oocytes not mature) with four ovarioles, Mated queens have activated ovaries (mature oocytes present) with four ovarioles. Scale bar 1 mm.

**Figure 2. The spermatheca of *T. carbonaria* females.** A) Queenright 14-day old worker with a vestigial spermatheca. B) Mated queen with a full spermatheca reservoir containing semen. C) Virgin queen with an empty spermatheca reservoir. D) Virgin queen with a full spermatheca reservoir containing semen and semi-activated ovaries, suggesting mating occurred recently. Spermatheca (\*). Scale bars 0.5 mm.

**Figure 3. Ovary length of 14-day old queenless *T. carbonaria* workers.** The workers were fed a Control diet ( $n = 40$ , 10 per microcolony) or a Royal jelly diet ( $n = 40$ , 10 per microcolony). Scale bars 0.25 mm. There was no significant difference between the treatment groups.

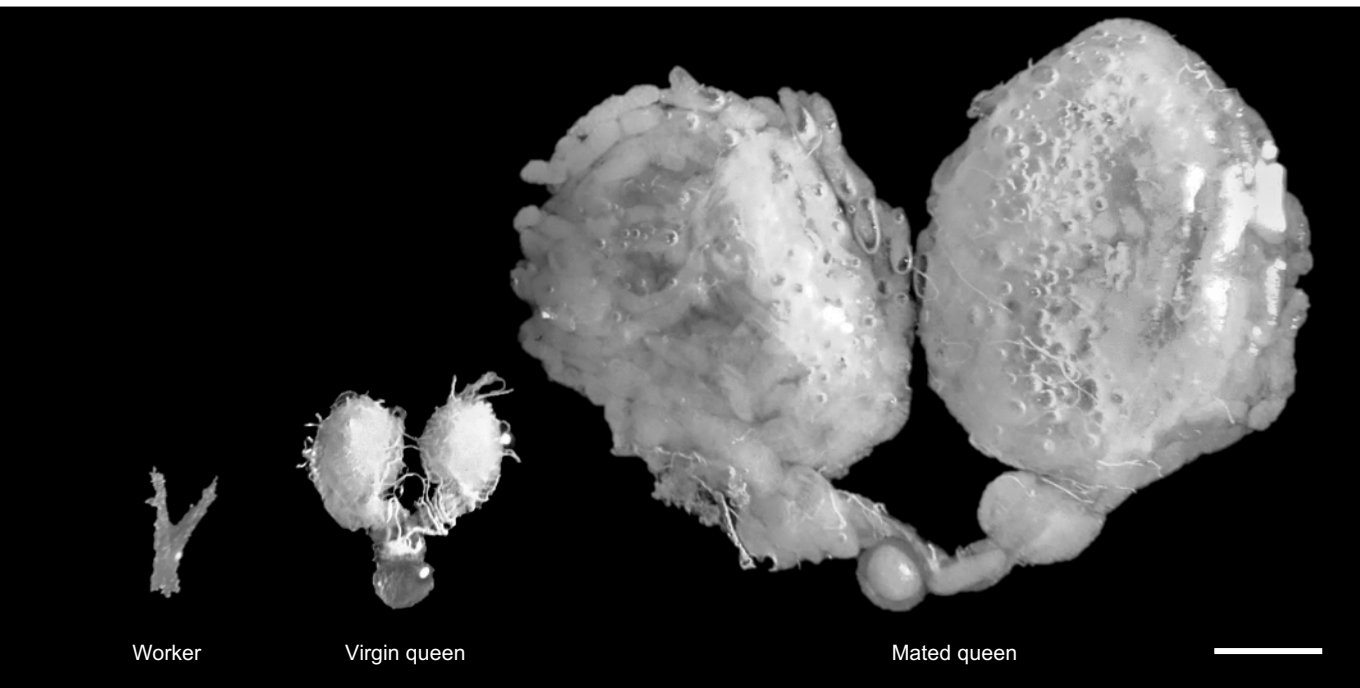

Worker

Virgin queen

Mated queen

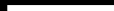

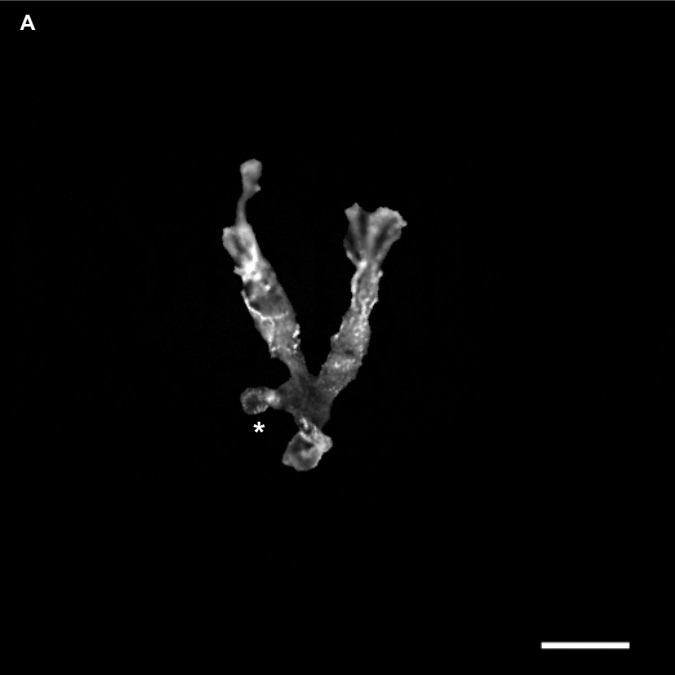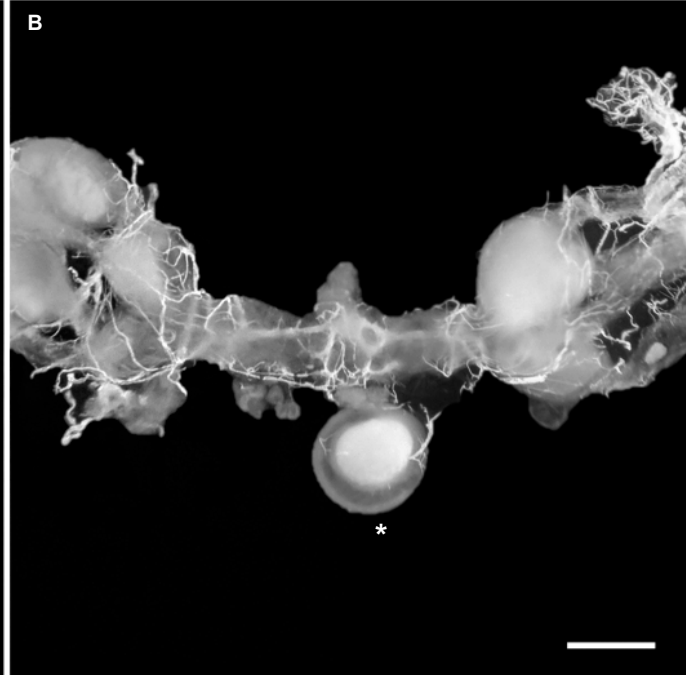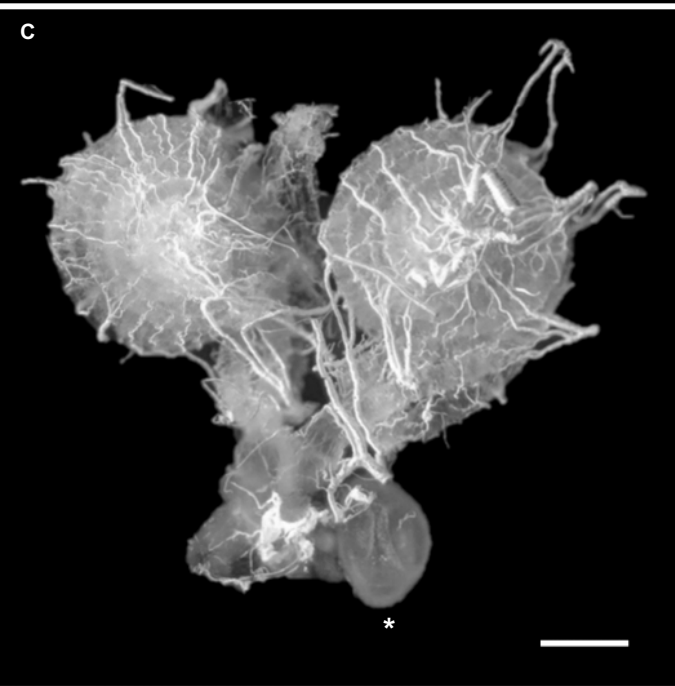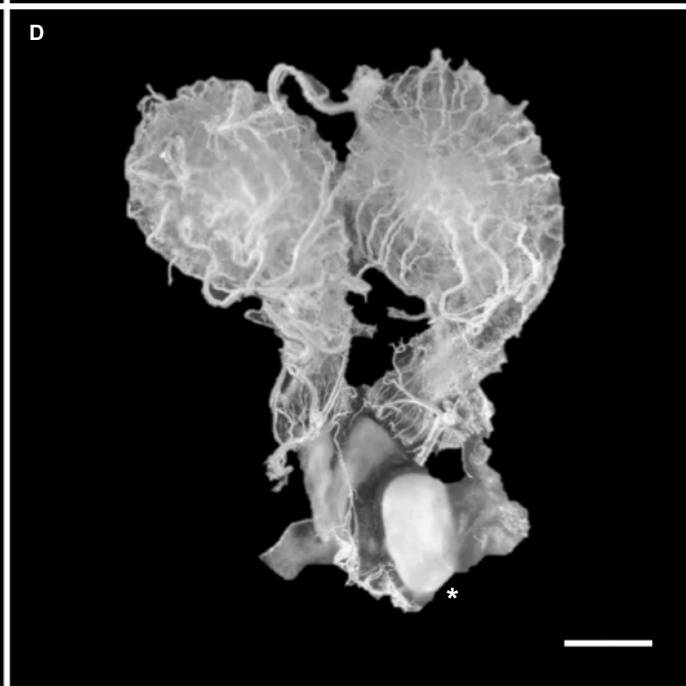

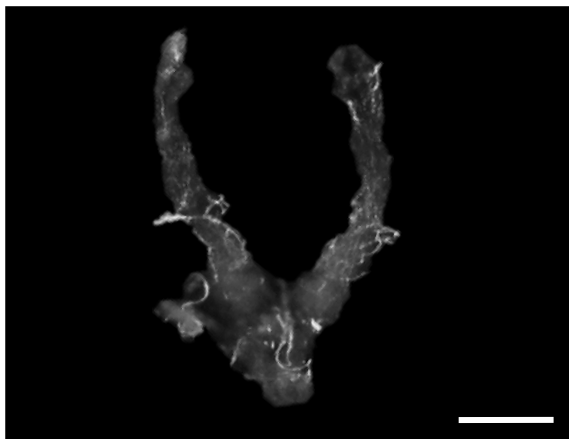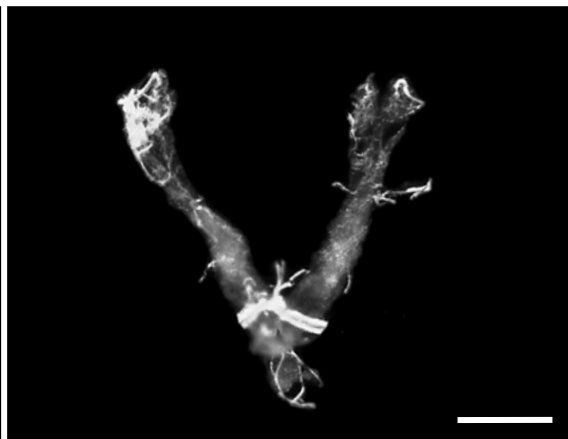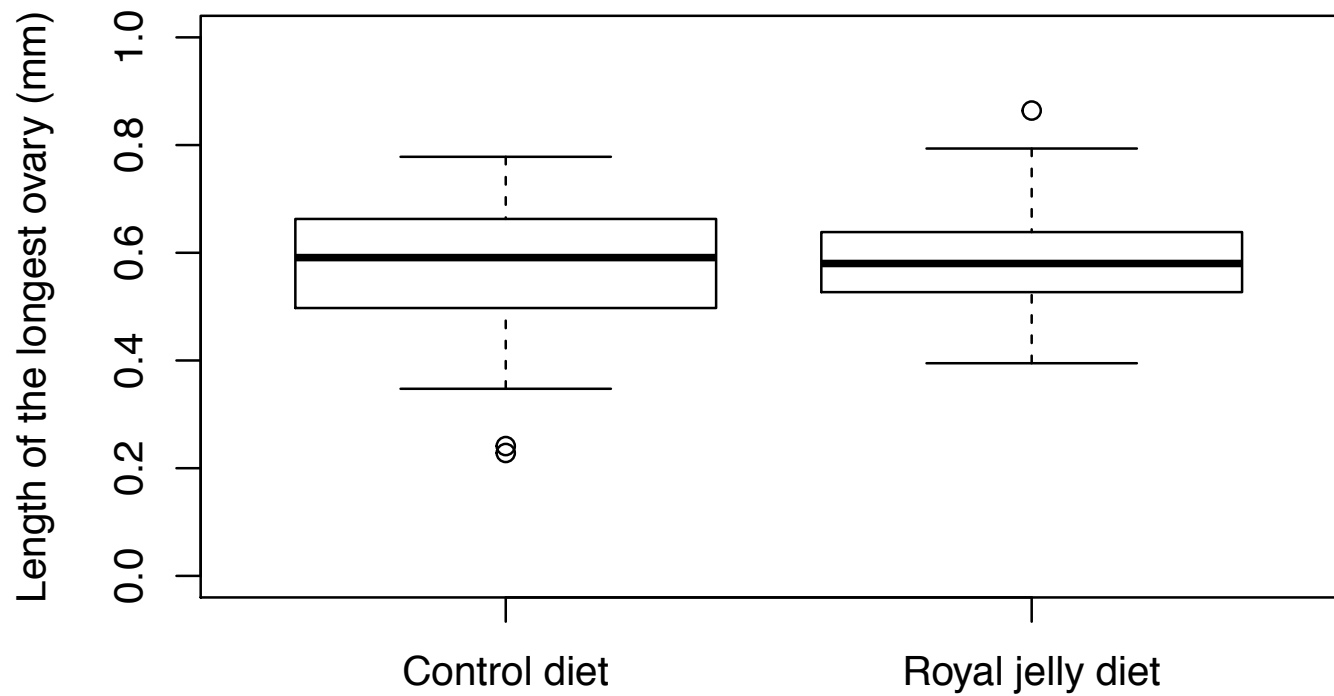

Source: http://biorxiv.org/content/10.1101/2020.06.05.136002v1.full.pdf
